# Supplementary material for: The Neural Basis of Mark Making: A Functional MRI Study of Drawing
Source: PubMed Central journal article supplement (PMC4182721; doi:10.1371/journal.pone.0108628), 2014-10-01
Supplement: pone.0108628.s001.pdf [file pone.0108628.s001.pdf]

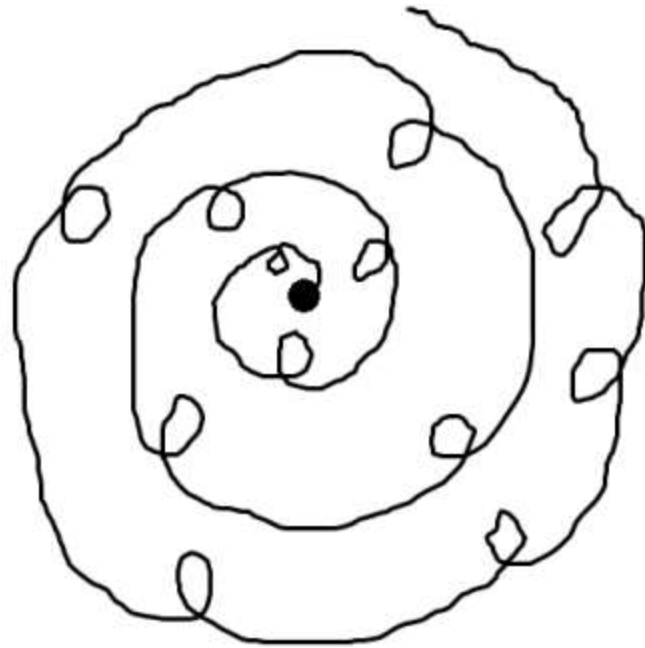

Counterclockwise Spiral

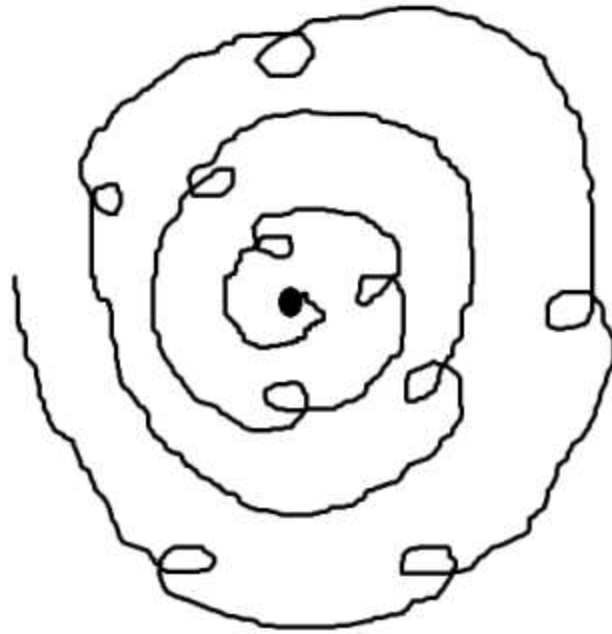

Clockwise Spiral

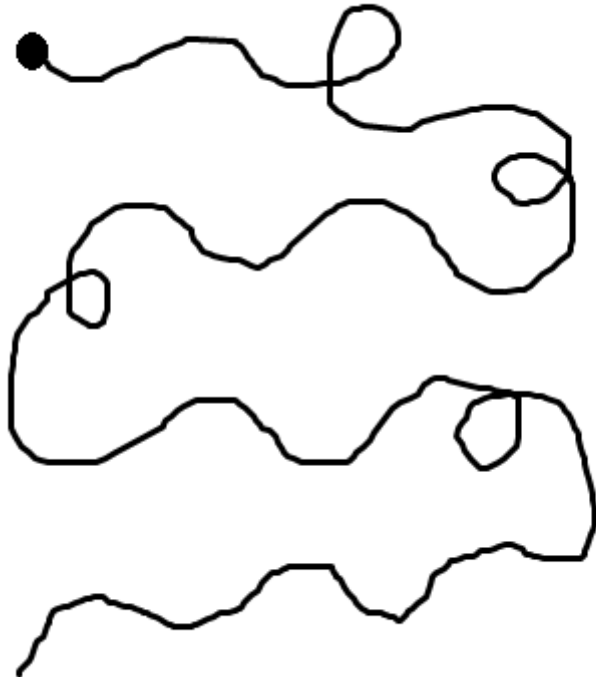

Left-to-right serpentine

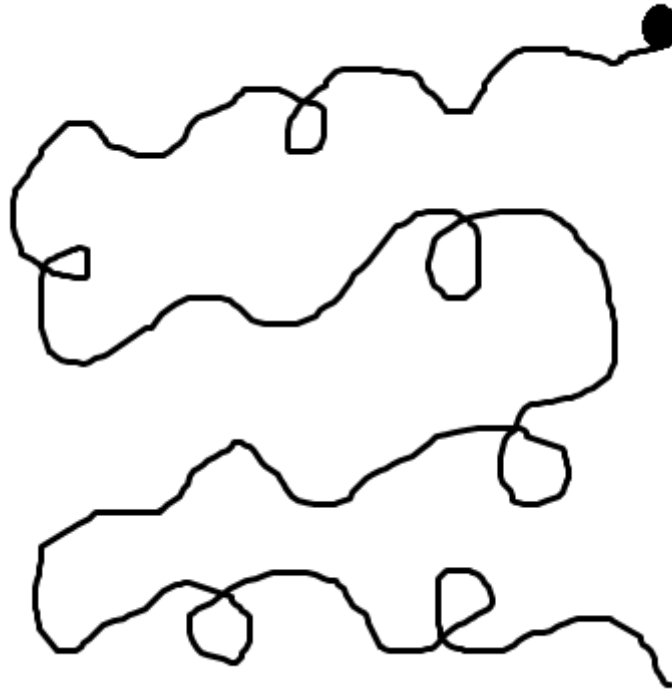

Right-to-left serpentine

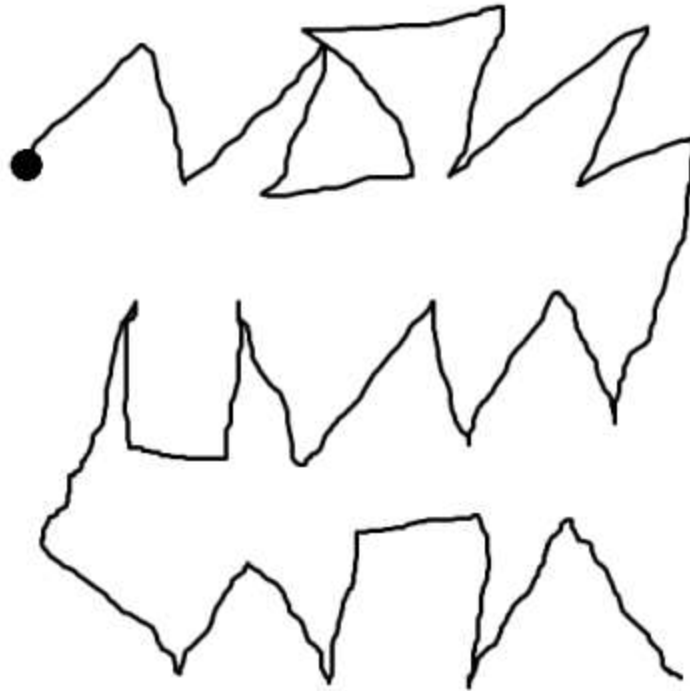

Left-to-right zigzag

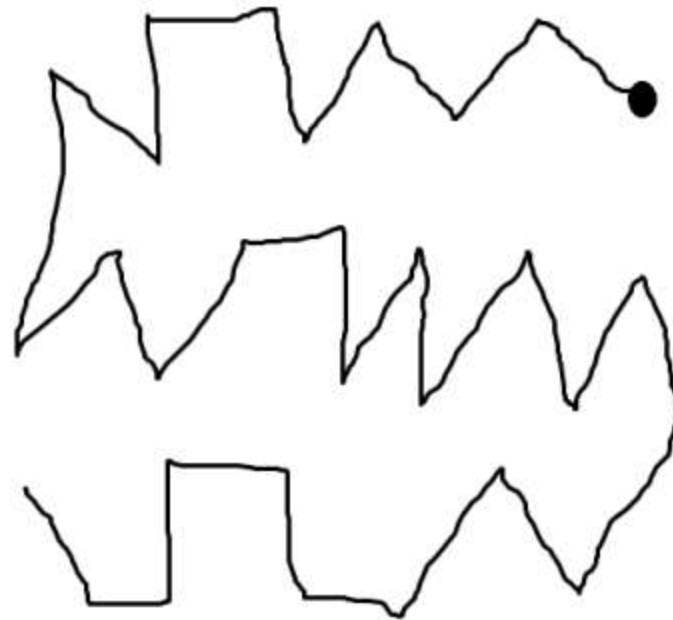

Right-to-left zigzag
